# Supplementary material for: Extraction of Membrane Components from Neisseria gonorrhoeae Using Catanionic Surfactant Vesicles: A New Approach for the Study of Bacterial Surface Molecules
Source: PubMed Central journal article supplement (PMC7559012; doi:10.3390/pharmaceutics12090787), 2020-08-20
Supplement: pharmaceutics-12-00787-s001.pdf [file pharmaceutics-12-00787-s001.pdf]

Article

# Supplementary Materials: Extraction of Membrane Components from *Neisseria gonorrhoeae* Using Catanionic Surfactant Vesicles: A New Approach for the Study of Bacterial Surface Molecules

Daniel C. Stein, Lenea H. Stocker, Abigail E. Powell, Salsawi Kebede, David Watts, Emma Williams, Nicholas Soto, Avantika Dhabaria, Catherine Fenselau, Shweta Ganapati and Philip DeShong

**Table S1.** Proteins identified in vesicles.

| UniProtA<br>C | Description                                                                             | # of spectra<br>identified |
|---------------|-----------------------------------------------------------------------------------------|----------------------------|
| Q5F5V7        | Major outer membrane protein porin P.IB                                                 | 270                        |
| Q5F939        | Pyruvate dehydrogenase E1 component                                                     | 154                        |
| Q5F865        | Putative peroxiredoxin family protein/glutaredoxin                                      | 153                        |
| Q5F9Q2        | Cysteine synthase                                                                       | 116                        |
| Q5F9M1        | Putative ABC transporter, periplasmic binding protein, amino acid                       | 109                        |
| Q5F6I1        | Outer membrane protein PIII                                                             | 83                         |
| Q5F7E7        | Aconitate hydratase 2                                                                   | 52                         |
| Q5F5P4        | Putative uncharacterized protein                                                        | 49                         |
| Q5F905        | 30S ribosomal protein S1                                                                | 45                         |
| Q5F7F3        | Peptidyl-prolyl cis-trans isomerase                                                     | 36                         |
| Q5F942        | Putative dihydrolipoamide dehydrogenase                                                 | 34                         |
| Q5F501        | Lipoprotein                                                                             | 33                         |
| Q5F724        | Antibiotic resistance efflux pump component                                             | 33                         |
| Q5F5Y3        | Putative ribonuclease E                                                                 | 32                         |
| Q5F6M3        | Cell division protein FtsZ                                                              | 32                         |
| Q5F725        | Antibiotic resistance efflux pump component                                             | 32                         |
| Q5F7W0        | Putative uncharacterized protein                                                        | 31                         |
| Q5F7T8        | Putative isocitrate dehydrogenase                                                       | 27                         |
| Q5F5J3        | Putative glyceraldehyde 3-phosphate dehydrogenase C                                     | 26                         |
| Q5F940        | Putative dihydrolipoamide acetyltransferase component of pyruvate dehydrogenase complex | 26                         |
| Q5FA20        | Putative phosphotransacetylase                                                          | 26                         |
| Q5F874        | Putative 2-oxoglutarate dehydrogenase, E1 component                                     | 25                         |
| Q5F4Y0        | Putative 3-oxoacyl-[acyl-carrier protein] reductase                                     | 22                         |
| Q5F824        | Acetate kinase                                                                          | 22                         |
| Q5F5L5        | Twitching motility/pilus retraction protein                                             | 21                         |
| Q5F649        | Putative thiol:disulphide interchange protein                                           | 21                         |
| Q5F731        | Glutamate dehydrogenase                                                                 | 21                         |
| Q5F809        | Lipid modified azurin protein                                                           | 21                         |
| Q5F7W9        | Putative ClpB protein                                                                   | 20                         |
| Q5F601        | Catalase                                                                                | 19                         |
| Q5FAI4        | Putative fructose-bisphosphate aldolase                                                 | 19                         |
| Q5F6N6        | Outer membrane opacity protein D                                                        | 18                         |
| Q5F7Y3        | Putative transketolase                                                                  | 18                         |
| Q5F8H0        | Putative GTP-binding protein                                                            | 18                         |
| Q5F6Q5        | Putative ABC transporter, periplasmic binding protein, polyamine                        | 17                         |
| Q5F7L8        | ABC transporter, periplasmic histidine-binding protein                                  | 17                         |
| Q5FA34        | Phosphoenolpyruvate synthase                                                            | 17                         |
| Q5F6R0        | Putative aspartyl-tRNA synthetase                                                       | 16                         |

|        |                                                                          |    |
|--------|--------------------------------------------------------------------------|----|
| Q5F6V3 | Putative alcohol dehydrogenase                                           | 14 |
| Q5F726 | Multidrug efflux pump channel protein                                    | 14 |
| Q5F815 | Genome-derived Neisseria antigen 1220                                    | 14 |
| Q5F716 | Putative cytochrome c oxidase subunit                                    | 13 |
| Q5F759 | Putative cytochrome                                                      | 13 |
| Q5F7X2 | Putative uncharacterized protein                                         | 13 |
| Q5F875 | Putative dihydrolipoamide succinyltransferase E2 component               | 13 |
| Q5F879 | Succinyl-CoA ligase [ADP-forming] subunit alpha                          | 12 |
| Q5FA46 | Putative zinc-binding alcohol dehydrogenase                              | 12 |
| Q5FAH2 | Carbamoyl-phosphate synthase large chain                                 | 11 |
| Q5F598 | Putative cytochrome C1                                                   | 10 |
| Q5F8H4 | Inosine-5'-monophosphate dehydrogenase                                   | 10 |
| Q5FAB8 | Putative uncharacterized protein                                         | 10 |
| Q5FAG7 | Pilus-associated protein                                                 | 10 |
| Q5F5N5 | Pyruvate kinase                                                          | 9  |
| Q5F5W8 | Outer membrane protein assembly factor BamA                              | 9  |
| Q5F6F9 | Glutamine synthetase                                                     | 9  |
| Q5F6M2 | Cell division protein ftsA                                               | 9  |
| Q5F9Z4 | Putative malic enzyme, malate dehydrogenase/oxaloacetate-decarboxylating | 9  |
| Q5F666 | Signal recognition particle protein                                      | 8  |
| Q5F8Q3 | Putative phosphogluconate dehydratase                                    | 8  |
| Q5F9F5 | Ribose-phosphate pyrophosphokinase                                       | 8  |
| Q5F9Z8 | Cell division protein ZipA                                               | 8  |
| Q5FAC8 | Putative pilus assembly protein                                          | 8  |
| Q5F5I9 | Putative electron transfer flavoprotein beta-subunit                     | 7  |
| Q5F798 | Putative N utilisation substance protein A                               | 7  |
| Q5F898 | Putative D-lactate dehydrogenase                                         | 7  |
| Q5F8T2 | Putative uncharacterized protein                                         | 7  |
| Q5FAD0 | Pilus assembly protein                                                   | 7  |
| Q5F4Z9 | Putative chromosome segregation protein                                  | 6  |
| Q5F693 | Pilus assembly protein                                                   | 6  |
| Q5F7T9 | Alpha-2,3-sialyltransferase                                              | 6  |
| Q5F842 | Aspartokinase                                                            | 6  |
| Q5F873 | Citrate synthase                                                         | 6  |
| Q5F8J6 | Putative DNA-binding protein Hu                                          | 6  |
| Q5F9K8 | Delta-aminolevulinic acid dehydratase                                    | 6  |
| Q5FA28 | Putative ABC transporter, periplasmic binding protein, polyamine         | 6  |
| Q5FA72 | Putative aminopeptidase N                                                | 6  |
| Q5FA80 | Putative ATP-dependent RNA helicase                                      | 6  |
| Q5F697 | Putative branched-chain amino acid aminotransferase                      | 5  |
| Q5F6A4 | Putative uncharacterized protein                                         | 5  |
| Q5F6U0 | Putative aminopeptidase                                                  | 5  |
| Q5F7F1 | Probable cytosol aminopeptidase                                          | 5  |
| Q5F7Y0 | Single-stranded DNA-binding protein                                      | 5  |
| Q5F848 | Putative uncharacterized protein                                         | 5  |
| Q5F876 | Dihydrolipoyl dehydrogenase                                              | 5  |
| Q5F884 | Putative uncharacterized protein                                         | 5  |
| Q5F8D7 | Putative uncharacterized protein                                         | 5  |
| Q5F8K6 | Putative peptidyl-prolyl cis-trans isomerase                             | 5  |
| Q5F8K8 | Putative ABC-transporter, ATP-binding protein                            | 5  |
| Q5F8X1 | Putative L-lactate dehydrogenase                                         | 5  |
| Q5F8Y0 | DNA gyrase subunit A                                                     | 5  |
| Q5F933 | Putative uncharacterized protein                                         | 5  |
| Q5F9I4 | Putative cold shock protein                                              | 5  |
| Q5FAC5 | Putative cytochrome                                                      | 5  |
| Q5F4X7 | Malonyl CoA-acyl carrier protein transacylase                            | 4  |
| Q5F533 | Putative DNA polymerase I                                                | 4  |
| Q5F5M0 | DNA-binding competence protein 2                                         | 4  |
| Q5F6I5 | Putative ABC transporter, ATP-binding protein                            | 4  |
| Q5F7C9 | Putative uncharacterized protein                                         | 4  |
| Q5F7G1 | Glutathione synthetase                                                   | 4  |
| Q5F8Q4 | Putative khg/kdpg 4-hydroxy-2-oxoglutarate aldolase                      | 4  |
| Q5F8W0 | Putative ATP-dependent RNA helicase                                      | 4  |

|        |                                                                  |   |
|--------|------------------------------------------------------------------|---|
| Q5F8Z6 | Ribonucleoside-diphosphate reductase                             | 4 |
| Q5F9L7 | Peptidyl-prolyl cis-trans isomerase                              | 4 |
| Q5F9P7 | Putative twitching motility-like protein                         | 4 |
| Q5F9S3 | Putative uncharacterized protein                                 | 4 |
| Q5F9W7 | Putative ABC transporter, ATP-binding protein, amino acid        | 4 |
| Q5FA35 | Transcription termination factor Rho                             | 4 |
| Q5FA55 | Putative two-component system transcriptional response regulator | 4 |
| Q5FAG0 | Putative GTP-binding protein                                     | 4 |
| Q5FAH6 | Acetyl-CoA carboxylase, biotin carboxylase                       | 4 |
| Q5F571 | Putative peptide methionine sulfoxide reductase                  | 3 |
| Q5F573 | Putative uncharacterized protein                                 | 3 |
| Q5F5L4 | Putative twitching motility-like protein                         | 3 |
| Q5F668 | Phospho-2-dehydro-3-deoxyheptonate aldolase                      | 3 |
| Q5F7E1 | Putative uncharacterized protein                                 | 3 |
| Q5F7J5 | Putative nitrogen regulatory protein P-II                        | 3 |
| Q5F7X0 | Tryptophan--tRNA ligase                                          | 3 |
| Q5F839 | Putative uncharacterized protein                                 | 3 |
| Q5F870 | Putative succinate dehydrogenase flavoprotein subunit            | 3 |
| Q5F8C2 | Putative uncharacterized protein                                 | 3 |
| Q5F8Q1 | Putative uncharacterized protein                                 | 3 |
| Q5F8S1 | Putative threonine synthase                                      | 3 |
| Q5F8V3 | Pseudouridine synthase                                           | 3 |
| Q5F9Y5 | Acetyl-coenzyme A carboxylase carboxyl transferase subunit beta  | 3 |
| Q5FA17 | ABC transporter, periplasmic binding protein, iron related       | 3 |
| Q5F574 | Putative ABC transporter, thiamine-binding periplasmic protein   | 2 |
| Q5F591 | Phosphoenolpyruvate-protein phosphotransferase                   | 2 |
| Q5F5D2 | Aspartate-semialdehyde dehydrogenase                             | 2 |
| Q5F5E4 | Putative uncharacterized protein                                 | 2 |
| Q5F5E6 | Methionine aminopeptidase                                        | 2 |
| Q5F5I8 | Putative electron transfer flavoprotein alpha-subunit            | 2 |
| Q5F5R0 | Transcription antitermination protein nusG                       | 2 |
| Q5F5X8 | Putative parA family protein-putative ATPase                     | 2 |
| Q5F5Z8 | Putative oligopeptidase A                                        | 2 |
| Q5F621 | Putative NADH dehydrogenase I chain G                            | 2 |
| Q5F655 | Putative adenylosuccinate lyase                                  | 2 |
| Q5F696 | Enoyl-[acyl-carrier-protein] reductase [NADH]                    | 2 |
| Q5F6K2 | Putative uncharacterized protein                                 | 2 |
| Q5F6Y6 | Aminomethyltransferase                                           | 2 |
| Q5F766 | Putative paraquat-inducible protein B                            | 2 |
| Q5F7M1 | Putative O-succinylhomoserine sulfhydrylase                      | 2 |
| Q5F866 | Putative dihydrolipoamide dehydrogenase                          | 2 |
| Q5F8D2 | Putative cell-division protein                                   | 2 |
| Q5F8Q2 | Glucose-6-phosphate 1-dehydrogenase                              | 2 |
| Q5F8S3 | Putative ferredoxin-NADP reductase                               | 2 |
| Q5F930 | Carbonic anhydrase                                               | 2 |
| Q5F950 | Putative TonB-dependent receptor                                 | 2 |
| Q5F9D9 | Putative aminotransferases                                       | 2 |
| Q5F9P8 | 5'-methylthioadenosine/S-adenosylhomocysteine nucleosidase       | 2 |
| Q5F9Q9 | Putative reductase                                               | 2 |
| Q5F9W0 | Outer membrane protein assembly factor BamD                      | 2 |

**Table S2.** Peptides identified by Mass Spectrometry.

| UniProtA<br>C | Description                 | Peptide              | Right<br>t AA | E-value      |
|---------------|-----------------------------|----------------------|---------------|--------------|
| Q5F905        | 30S ribosomal protein<br>S1 | NAQGEIEVK            | V             | 0.002        |
| Q5F905        | 30S ribosomal protein<br>S1 | VGDFVTVTIESVENGFGETK | L             | 2.9E-06      |
| Q5F905        | 30S ribosomal protein<br>S1 | GGLTVMISSIR          | A             | 0.00006<br>7 |
| Q5F905        | 30S ribosomal protein<br>S1 | AFLPGSLVDVRPVK       | D             | 0.00000<br>2 |

|        |                                                            |                          |   |              |
|--------|------------------------------------------------------------|--------------------------|---|--------------|
| Q5F905 | 30S ribosomal protein S1                                   | AFLPGSLVDVVRPVKDTSHFEKG  | E | 0.014        |
| Q5F905 | 30S ribosomal protein S1                                   | RAVLEATLGEER             | K | 0.00028      |
| Q5F905 | 30S ribosomal protein S1                                   | AVLEATLGEERK             | A | 0.00008<br>2 |
| Q5F905 | 30S ribosomal protein S1                                   | KALLENLQEGSVIK           | G | 8.6E-08      |
| Q5F905 | 30S ribosomal protein S1                                   | ALLENLQEGSVIK            | G | 0.00001<br>1 |
| Q5F905 | 30S ribosomal protein S1                                   | RVKHPSEVLEVGQEVEAK       | V | 0.00009<br>6 |
| Q5F905 | 30S ribosomal protein S1                                   | VKHPSEVLEVGQEVEAK        | V | 1.6E-08      |
| Q5F905 | 30S ribosomal protein S1                                   | QLGEDPWSGLTR             | R | 0.00004<br>9 |
| Q5F905 | 30S ribosomal protein S1                                   | RYPQATR                  | L | 0.022        |
| Q5F905 | 30S ribosomal protein S1                                   | QLEGDPFGNFISVNDKGS�VK    | G | 0.00018      |
| Q5F905 | 30S ribosomal protein S1                                   | LKEGDEVEAVIVTVDRK        | N | 1.2E-07      |
| Q5F905 | 30S ribosomal protein S1                                   | EALNSVNAAANANAGTTSGLDLLK | A | 6.2E-12      |
| Q5F9P8 | 5'-methylthioadenosine/S-adenosylhomocysteine nucleosidase | GQVPQLPAR                | F | 0.036        |
| Q5F9P8 | 5'-methylthioadenosine/S-adenosylhomocysteine nucleosidase | FASDGILLETAKR            | A | 0.00047      |
| Q5FA17 | ABC transporter, periplasmic binding protein, iron related | GDQLAGQIKEEGSR           | S | 0.00006<br>8 |
| Q5FA17 | ABC transporter, periplasmic binding protein, iron related | LEAPQVSATTVSEKEHATR      | L | 9.3E-07      |
| Q5F7L8 | ABC transporter, periplasmic histidine-binding protein     | VASNAEFAPFESLDSK         | G | 0.00001<br>6 |
| Q5F7L8 | ABC transporter, periplasmic histidine-binding protein     | GNVEGFDVDLMNAMAK         | A | 4.5E-08      |
| Q5F7L8 | ABC transporter, periplasmic histidine-binding protein     | AGNFKIEFK                | H | 0.012        |
| Q5F7L8 | ABC transporter, periplasmic histidine-binding protein     | QSMDFSDPYFEITQVVLPK      | G | 2.9E-06      |
| Q5F7L8 | ABC transporter, periplasmic histidine-binding protein     | VGVVTGHTGDFSVsK          | L | 0.00039      |
| Q5F7L8 | ABC transporter, periplasmic histidine-binding protein     | LLGNDNPK                 | I | 0.0019       |
| Q5F7L8 | ABC transporter, periplasmic histidine-binding protein     | FENVPLIIK                | E | 0.0022       |
| Q5F7L8 | ABC transporter, periplasmic histidine-binding protein     | ELENGGLDSVSDSAVIANYYK    | N | 0.016        |
| Q5F7L8 | ABC transporter, periplasmic histidine-binding protein     | GMDFVTLPDFTTEHYGI AVR    | K | 0.0031       |

|        |                                                                       |                            |   |              |
|--------|-----------------------------------------------------------------------|----------------------------|---|--------------|
| Q5F824 | Acetate kinase                                                        | LILVLNCGSSSLK              | G | 0.00003<br>2 |
| Q5F824 | Acetate kinase                                                        | VVSGGELYNESILVDDEVIAGIEK   | C | 1E-07        |
| Q5F824 | Acetate kinase                                                        | CIPLAPLHNPAPHLGLR          | A | 2.4E-07      |
| Q5F824 | Acetate kinase                                                        | GLPNVVVFDTSFHQTMPEVAYK     | Y | 0.00000<br>4 |
| Q5F824 | Acetate kinase                                                        | YGAHGTSYR                  | F | 0.00011      |
| Q5F824 | Acetate kinase                                                        | FVADETAHFLGK               | D | 0.00012      |
| Q5F824 | Acetate kinase                                                        | FVADETAHFLGKDKK            | D | 0.0073       |
| Q5F824 | Acetate kinase                                                        | DTSMGLTPLEGLVMGTR          | S | 0.00009<br>5 |
| Q5F824 | Acetate kinase                                                        | TIEEEAAKGHKGAK             | L | 0.00008      |
| Q5F824 | Acetate kinase                                                        | FGNAGVITTADSK              | A | 3.7E-09      |
| Q5F824 | Acetate kinase                                                        | AVAVVIPTNEELMIAHDTAR       | L | 3.8E-06      |
| Q5F9Y5 | Acetyl-coenzyme A<br>carboxylase carboxyl<br>transferase subunit beta | CNHHNPLSAR                 | Q | 0.024        |
| Q5F9Y5 | Acetyl-coenzyme A<br>carboxylase carboxyl<br>transferase subunit beta | FIGGSMGSVVGGER             | F | 0.00021      |
| Q5F9Y5 | Acetyl-coenzyme A<br>carboxylase carboxyl<br>transferase subunit beta | TSAALHLLTEK                | R | 0.0056       |
| Q5F7E7 | Aconitate hydratase 2                                                 | AALGIPALPLNAQQTADLVELLK    | N | 0.00002<br>5 |
| Q5F7E7 | Aconitate hydratase 2                                                 | NPPAGEGEFLVELLAHR          | V | 8.8E-06      |
| Q5F7E7 | Aconitate hydratase 2                                                 | VKASFLAAVAEGSASSPLVSPK     | Y | 3.5E-08      |
| Q5F7E7 | Aconitate hydratase 2                                                 | ASFLAAVAEGSASSPLVSPK       | Y | 0.00006<br>1 |
| Q5F7E7 | Aconitate hydratase 2                                                 | AKVPEKITVTVFK              | V | 0.0092       |
| Q5F7E7 | Aconitate hydratase 2                                                 | DGITPDKPGEVGPPIK           | L | 0.007        |
| Q5F7E7 | Aconitate hydratase 2                                                 | DGITPDKPGEVGPPIKLEELK      | A | 0.021        |
| Q5F7E7 | Aconitate hydratase 2                                                 | AKGHPVAYVGDVVGTGSSR        | K | 0.00001<br>3 |
| Q5F7E7 | Aconitate hydratase 2                                                 | GHPVAYVGDVVGTGSSR          | K | 1.2E-09      |
| Q5F7E7 | Aconitate hydratase 2                                                 | GHPVAYVGDVVGTGSSRK         | S | 0.00001<br>5 |
| Q5F7E7 | Aconitate hydratase 2                                                 | KSATNSVIWHTGEDIPFVPNKR     | F | 0.00029      |
| Q5F7E7 | Aconitate hydratase 2                                                 | SATNSVIWHTGEDIPFVPNKR      | F | 0.0034       |
| Q5F7E7 | Aconitate hydratase 2                                                 | IAPIFFNTQEDSGALPIEVDVSALK  | M | 1.8E-07      |
| Q5F7E7 | Aconitate hydratase 2                                                 | SOVLLDEVQAGGR              | I | 2.7E-08      |
| Q5F7E7 | Aconitate hydratase 2                                                 | ACGLPEGQGVPRPGTYCEPR       | M | 0.013        |
| Q5F7E7 | Aconitate hydratase 2                                                 | MTTVGSQDTTGPMTR            | D | 0.00005<br>6 |
| Q5F7E7 | Aconitate hydratase 2                                                 | THKELPAFISTR               | G | 0.00084      |
| Q5F7E7 | Aconitate hydratase 2                                                 | GGVSLRPGDGVIIHSLNLR        | L | 0.014        |
| Q5F7E7 | Aconitate hydratase 2                                                 | DLVNAIPLYAIK               | Q | 0.0011       |
| Q5F7E7 | Aconitate hydratase 2                                                 | LNKEPIIEYMK                | S | 0.0031       |
| Q5F7E7 | Aconitate hydratase 2                                                 | LLEGKSDIPVR                | L | 0.00009<br>9 |
| Q5F7E7 | Aconitate hydratase 2                                                 | ELSDEGHYGVLGR              | A | 0.00012      |
| Q5F7E7 | Aconitate hydratase 2                                                 | EGATVMSTSTR                | N | 2.5E-06      |
| Q5F7E7 | Aconitate hydratase 2                                                 | NTFVYLGSAELAAICSK          | L | 0.00075      |
| Q5F7E7 | Aconitate hydratase 2                                                 | LGKIPTVEEYQANIGIINEQGDKIYR | Y | 0.0013       |
| Q5F7E7 | Aconitate hydratase 2                                                 | IPTVEEYQANIGIINEQGDKIYR    | Y | 1.6E-07      |
| Q5F7T9 | Alpha-2,3-<br>sialyltransferase                                       | NASDEHYTIFK                | G | 0.0012       |
| Q5F7T9 | Alpha-2,3-<br>sialyltransferase                                       | KMTYLPLFDASELKAGDETGGTVR   | I | 0.00001<br>2 |
| Q5F7T9 | Alpha-2,3-<br>sialyltransferase                                       | ILLGSPDKEMKEISEK           | A | 0.00018      |
| Q5F7T9 | Alpha-2,3-<br>sialyltransferase                                       | NFNIQYVAPHPR               | Q | 0.00001<br>7 |

|        |                                             |                               |   |          |
|--------|---------------------------------------------|-------------------------------|---|----------|
| Q5F6Y6 | Aminomethyltransferase                      | AFFRKLIVANDVAK                | L | 0.037    |
| Q5F6Y6 | Aminomethyltransferase                      | ALQTAGVQCGLGAR                | D | 0.041    |
| Q5F724 | Antibiotic resistance efflux pump component | AQVGGIIQK                     | R | 0.023    |
| Q5F724 | Antibiotic resistance efflux pump component | AQVGGIIQKR                    | L | 0.000097 |
| Q5F724 | Antibiotic resistance efflux pump component | AGQPLYQIDSSTYEAGLESAR         | A | 5.2E-10  |
| Q5F724 | Antibiotic resistance efflux pump component | AQLATAQATLAK                  | A | 0.00037  |
| Q5F724 | Antibiotic resistance efflux pump component | SAEAGVKAAQAAIK                | S | 0.0094   |
| Q5F724 | Antibiotic resistance efflux pump component | SAGINLNR                      | S | 0.00099  |
| Q5F724 | Antibiotic resistance efflux pump component | SRITAPISGFIGQSK               | V | 0.00016  |
| Q5F724 | Antibiotic resistance efflux pump component | ITAPISGFIGQSK                 | V | 3.9E-06  |
| Q5F724 | Antibiotic resistance efflux pump component | VSEGTLLNAGDTTVLATIR           | Q | 5E-08    |
| Q5F724 | Antibiotic resistance efflux pump component | QTNPMYVNVTSASEVMK             | L | 1.3E-08  |
| Q5F724 | Antibiotic resistance efflux pump component | AAVSNDQNILMPGLYVR             | V | 2.9E-07  |
| Q5F724 | Antibiotic resistance efflux pump component | VLMDQVAADNAFIVPQQAVTR         | G | 0.00013  |
| Q5F724 | Antibiotic resistance efflux pump component | GAKDVMIVNAQGGMEPR             | E | 1.7E-07  |
| Q5F724 | Antibiotic resistance efflux pump component | EWAPSENQAAAPQAGVQTASEAKPASEAK | - | 0.00073  |
| Q5F725 | Antibiotic resistance efflux pump component | LSEVLSTLPATVQQYGVTVSK         | A | 0.0012   |
| Q5F725 | Antibiotic resistance efflux pump component | ANTDGSNIYLKDVAK               | V | 0.000014 |
| Q5F725 | Antibiotic resistance efflux pump component | TDATLAQVTQLAK                 | S | 8.4E-07  |
| Q5F725 | Antibiotic resistance efflux pump component | TASGSDAVAVAGK                 | L | 0.0051   |
| Q5F725 | Antibiotic resistance efflux pump component | ASGLFDPSTVR                   | A | 0.0026   |
| Q5F725 | Antibiotic resistance efflux pump component | AGGLEDSPQLK                   | I | 0.0019   |

|        |                                                   |                                |   |              |
|--------|---------------------------------------------------|--------------------------------|---|--------------|
| Q5F725 | Antibiotic resistance<br>efflux pump<br>component | AAAAAQGISFADIR                 | T | 3E-08        |
| Q5F725 | Antibiotic resistance<br>efflux pump<br>component | TALASALSSSYVSDFPNQGR           | L | 8.5E-09      |
| Q5F725 | Antibiotic resistance<br>efflux pump<br>component | MQPADILNLTVPNK                 | S | 1.1E-06      |
| Q5F725 | Antibiotic resistance<br>efflux pump<br>component | SGVAVPLSTIATVSWENGTEQSVR       | F | 0.0079       |
| Q5F725 | Antibiotic resistance<br>efflux pump<br>component | LSASPATGVSTGQAMAAVQK           | M | 6.9E-10      |
| Q5F725 | Antibiotic resistance<br>efflux pump<br>component | AGITGSDDKQY                    | - | 0.012        |
| Q5F842 | Aspartokinase                                     | YGGTSVGSPPER                   | I | 0.01         |
| Q5F842 | Aspartokinase                                     | AAVTGIAFDKNQAR                 | I | 0.00001      |
| Q5FAH2 | Carbamoyl-phosphate<br>synthase large chain       | TPASFEPSIDYVVTK                | I | 0.00063      |
| Q5FAH2 | Carbamoyl-phosphate<br>synthase large chain       | ELANPGPER                      | M | 0.0066       |
| Q5FAH2 | Carbamoyl-phosphate<br>synthase large chain       | VLNDLGLRQPPNR                  | I | 0.016        |
| Q5FAH2 | Carbamoyl-phosphate<br>synthase large chain       | IAHNEEEALVK                    | A | 0.004        |
| Q5FAH2 | Carbamoyl-phosphate<br>synthase large chain       | AEEIGYPLVVRPSYVLGGR            | A | 0.01         |
| Q5FAH2 | Carbamoyl-phosphate<br>synthase large chain       | VPQYTTTAGGEAMSEGA              | S | 5.5E-07      |
| Q5F601 | Catalase                                          | TTSKCPVTHLTMNNGAPVADNQNSLTAGPR | G | 4.6E-06      |
| Q5F601 | Catalase                                          | CPVTHLTMNNGAPVADNQNSLTAGPR     | G | 0.0049       |
| Q5F601 | Catalase                                          | GPLLTQDLWLNEK                  | L | 0.00057      |
| Q5F601 | Catalase                                          | EVIPERR                        | M | 0.0025       |
| Q5F601 | Catalase                                          | FTTVAGER                       | G | 0.049        |
| Q5F601 | Catalase                                          | LFNYADAQR                      | Y | 0.00003      |
| Q5F601 | Catalase                                          | QIPVNRPR                       | C | 0.0053       |
| Q5F601 | Catalase                                          | ALFNLMNDAQK                    | Q | 0.00003<br>8 |
| Q5F601 | Catalase                                          | QALFDNTAAAMGDAPDFIK            | Y | 0.00001<br>3 |
| Q5F601 | Catalase                                          | QALFDNTAAAMGDAPDFIKYR          | H | 5.7E-06      |
| Q5F601 | Catalase                                          | CDPAYGEGVAK                    | A | 0.0019       |
| Q5F6M2 | Cell division protein<br>ftsA                     | ITHVTTGIAGNHIR                 | S | 1.2E-07      |
| Q5F6M2 | Cell division protein<br>ftsA                     | VHIITGASTAVQNVQK               | C | 1.6E-08      |
| Q5F6M3 | Cell division protein<br>FtsZ                     | MEFVYDVAESA VSPAVIK            | V | 5.2E-06      |
| Q5F6M3 | Cell division protein<br>FtsZ                     | VIGLGGGGCNAINNMVANNVR          | S | 2E-07        |
| Q5F6M3 | Cell division protein<br>FtsZ                     | SVEFISANTDAQSLAK               | N | 2.3E-07      |
| Q5F6M3 | Cell division protein<br>FtsZ                     | RIQLGTNLTR                     | G | 0.00084      |
| Q5F6M3 | Cell division protein<br>FtsZ                     | IQLGTNLTR                      | G | 0.00057      |
| Q5F6M3 | Cell division protein<br>FtsZ                     | GLGAGANPDIGR                   | A | 0.00001<br>5 |
| Q5F6M3 | Cell division protein<br>FtsZ                     | GIAMMGSGYAQGIDR                | A | 6.8E-07      |

|        |                                                      |                                |   |          |
|--------|------------------------------------------------------|--------------------------------|---|----------|
| Q5F6M3 | Cell division protein<br>FtsZ                        | MATDQAISSPLDDVTLDGAR           | G | 8.8E-08  |
| Q5F6M3 | Cell division protein<br>FtsZ                        | GVLVNITTAPGCLK                 | M | 1.9E-08  |
| Q5F6M3 | Cell division protein<br>FtsZ                        | IVNQSAHPDLECK                  | F | 0.0016   |
| Q5F6M3 | Cell division protein<br>FtsZ                        | ITIIATGLKEK                    | G | 0.00056  |
| Q5F6M3 | Cell division protein<br>FtsZ                        | GAVDPTPAR                      | E | 0.0055   |
| Q5F6M3 | Cell division protein<br>FtsZ                        | GAVDPTPAREVEAVAPSKQEQSHNVEGMIR | T | 0.017    |
| Q5F6M3 | Cell division protein<br>FtsZ                        | EVEAVAPSKQEQSHNVEGMIR          | T | 0.000015 |
| Q5F9Z8 | Cell division protein<br>ZipA                        | VRDQFGHSDKDALLNSK              | T | 1.6E-06  |
| Q5F9Z8 | Cell division protein<br>ZipA                        | TSHVRDGGKPSGGPVMMPKQPQPAVK     | K | 0.00088  |
| Q5F9Z8 | Cell division protein<br>ZipA                        | KPAKPQDSAMR                    | N | 0.011    |
| Q5F9Z8 | Cell division protein<br>ZipA                        | NLQEQDAVYIAK                   | Q | 0.00012  |
| Q5F873 | Citrate synthase                                     | SKSIKLNVPGR                    | A | 0.0033   |
| Q5F873 | Citrate synthase                                     | SIKLNVPGR                      | A | 0.0022   |
| Q5F873 | Citrate synthase                                     | AGLELPVLEASIGHDVVDIR           | G | 8.5E-06  |
| Q5F873 | Citrate synthase                                     | IFILHADHEQNASTSTVR             | L | 1.2E-06  |
| Q5F873 | Citrate synthase                                     | RDYVPAGER                      | - | 0.0098   |
| Q5F9Q2 | Cysteine synthase                                    | MKIANSITELIGNTPLVK             | L | 3.4E-09  |
| Q5F9Q2 | Cysteine synthase                                    | IANSITELIGNTPLVK               | L | 0.0029   |
| Q5F9Q2 | Cysteine synthase                                    | GLKAEVAVK                      | L | 0.0059   |
| Q5F9Q2 | Cysteine synthase                                    | TFGAELILTPAAEGMAGAIK           | A | 3.7E-07  |
| Q5F9Q2 | Cysteine synthase                                    | AQSLVDAHPTDYFMPR               | Q | 1E-07    |
| Q5F9Q2 | Cysteine synthase                                    | QFDNEANPEVHR                   | K | 0.00042  |
| Q5F9Q2 | Cysteine synthase                                    | QFDNEANPEVHRK                  | T | 0.00021  |
| Q5F9Q2 | Cysteine synthase                                    | GPHPIQGIGAGFIPTVLNTK           | I | 1E-08    |
| Q5F9Q2 | Cysteine synthase                                    | IYDSIAKVPNEAAFETAR             | A | 1.8E-06  |
| Q5F9Q2 | Cysteine synthase                                    | VPNEAAFETAR                    | A | 5.1E-07  |
| Q5F9Q2 | Cysteine synthase                                    | EGILAGISSGAAVWSALQLAK          | Q | 5.3E-07  |
| Q5F9Q2 | Cysteine synthase                                    | QPENEGKLIVVLLPSYGER            | Y | 3.1E-06  |
| Q5F9Q2 | Cysteine synthase                                    | LIVVLLPSYGER                   | Y | 0.000076 |
| Q5F9K8 | Delta-aminolevulinic<br>acid dehydratase             | LGIPMLALFPVVTANK               | T | 9.6E-06  |
| Q5F9K8 | Delta-aminolevulinic<br>acid dehydratase             | AQEAYNPEGLVPSTVR               | A | 0.000028 |
| Q5F876 | Dihydrolipoyl<br>dehydrogenase                       | SQYDVVVIGAGPGGYVAAIR           | A | 3.7E-08  |
| Q5F876 | Dihydrolipoyl<br>dehydrogenase                       | TNLPNVWAIGDVVR                 | G | 4.2E-06  |
| Q5F876 | Dihydrolipoyl<br>dehydrogenase                       | ASDEGVAVAER                    | I | 2.7E-06  |
| Q5F8Y0 | DNA gyrase subunit A                                 | IVGDVIGK                       | Y | 0.049    |
| Q5F8Y0 | DNA gyrase subunit A                                 | IIDFVDILSKPER                  | I | 0.000023 |
| Q5F8Y0 | DNA gyrase subunit A                                 | KNKGGQGSIAINTGER               | N | 0.0023   |
| Q5F8Y0 | DNA gyrase subunit A                                 | LINLDEGETLVSLER                | V | 0.00024  |
| Q5F5M0 | DNA-binding<br>competence protein 2                  | VKGIGPAVLAK                    | L | 0.00015  |
| Q5F5M0 | DNA-binding<br>competence protein 2                  | LKDQASVGAPAPK                  | G | 1.8E-06  |
| Q5F696 | Enoyl-[acyl-carrier-<br>protein] reductase<br>[NADH] | EAFNTAHEISAYSLPALAK            | A | 0.000045 |



|        |                                               |                        |   |              |
|--------|-----------------------------------------------|------------------------|---|--------------|
| Q5F696 | Enoyl-[acyl-carrier-protein] reductase [NADH] | TLAASGIADFGK           | L | 0.023        |
| Q5F8I5 | Genome-derived<br>Neisseria antigen 1220      | AMQAQITAER             | E | 0.00008<br>4 |
| Q5F8I5 | Genome-derived<br>Neisseria antigen 1220      | AMQAQITAEREK           | R | 0.00027      |
| Q5F8I5 | Genome-derived<br>Neisseria antigen 1220      | IAESEGRKIEQINLASGQR    | E | 0.0047       |
| Q5F8I5 | Genome-derived<br>Neisseria antigen 1220      | KIEQINLASGQR           | E | 2.2E-06      |
| Q5F8I5 | Genome-derived<br>Neisseria antigen 1220      | IEQINLASGQR            | E | 0.039        |
| Q5F8I5 | Genome-derived<br>Neisseria antigen 1220      | EAEIQQSEGEAQAAVNASNAEK | I | 1E-07        |
| Q5F8I5 | Genome-derived<br>Neisseria antigen 1220      | QIAAALQTQGGADAVNLK     | I | 6.8E-12      |
| Q5F8I5 | Genome-derived<br>Neisseria antigen 1220      | IAEQYVAAFNNLAK         | E | 0.00001<br>2 |
| Q5F731 | Glutamate<br>dehydrogenase                    | TDLNTLFANLK            | Q | 1.4E-06      |
| Q5F731 | Glutamate<br>dehydrogenase                    | TDLNTLFANLKQR          | N | 0.00023      |
| Q5F731 | Glutamate<br>dehydrogenase                    | NPKYTQQSLER            | I | 0.0057       |
| Q5F731 | Glutamate<br>dehydrogenase                    | YTQQSLER               | I | 9.6E-06      |
| Q5F731 | Glutamate<br>dehydrogenase                    | FLAFEQVFK              | N | 0.043        |
| Q5F731 | Glutamate<br>dehydrogenase                    | VLISGSGNVAQYAAEK       | A | 7.1E-09      |
| Q5F731 | Glutamate<br>dehydrogenase                    | ASNAGGVATSGLEMSQNAIR   | L | 3E-11        |
| Q5F731 | Glutamate<br>dehydrogenase                    | VGDKVNYYNGANIAGFVK     | V | 2.1E-06      |
| Q5F6F9 | Glutamine synthetase                          | GGYAPVAPIDCGQDLR       | S | 0.00027      |
| Q5F6F9 | Glutamine synthetase                          | FATLVKR                | A | 0.0026       |
| Q5F6F9 | Glutamine synthetase                          | ALNAITNPSTNSYK         | R | 0.0074       |
| Q5F6F9 | Glutamine synthetase                          | ALNAITNPSTNSYKR        | L | 0.00001      |
| Q5F6F9 | Glutamine synthetase                          | LVPHFAPTK              | L | 0.027        |
| Q5F6F9 | Glutamine synthetase                          | LVPHFAPTKLAYSAK        | N | 0.0006       |
| Q5F6F9 | Glutamine synthetase                          | SASIRIPSVNSSK          | A | 0.0019       |
| Q5F7G1 | Glutathione synthetase                        | AADKVQTALK             | E | 0.015        |
| Q5F7G1 | Glutathione synthetase                        | FTAPTLVTTR             | S | 0.00002<br>6 |
| Q5F7G1 | Glutathione synthetase                        | YIPEIVHGDKR            | I | 0.046        |
| Q5F7G1 | Glutathione synthetase                        | ILIIGGEVVPYALAR        | I | 0.00009<br>5 |
| Q5F8H4 | Inosine-5'-<br>monophosphate<br>dehydrogenase | AYTFDDVLLVPAHSTVLPR    | D | 2.9E-07      |
| Q5F8H4 | Inosine-5'-<br>monophosphate<br>dehydrogenase | EITLNLPLLSAAMDTVTEAR   | L | 1.6E-07      |
| Q5F8H4 | Inosine-5'-<br>monophosphate<br>dehydrogenase | RHESGVVKDPVTVAPTTLIR   | E | 0.0025       |
| Q5F8H4 | Inosine-5'-<br>monophosphate<br>dehydrogenase | HESGVVKDPVTVAPTTLIR    | E | 0.00001<br>5 |
| Q5F8H4 | Inosine-5'-<br>monophosphate<br>dehydrogenase | TTEFPNANKDSEGR         | L | 0.0012       |

|        |                                               |                              |   |              |
|--------|-----------------------------------------------|------------------------------|---|--------------|
| Q5F8H4 | Inosine-5'-<br>monophosphate<br>dehydrogenase | VGAAVGTGGDTERVK              | A | 0.00072      |
| Q5F8H4 | Inosine-5'-<br>monophosphate<br>dehydrogenase | IVAGVGVQLTAIHNVAEALK         | G | 0.001        |
| Q5F809 | Lipid modified azurin<br>protein              | ACKEFTITLK                   | H | 0.013        |
| Q5F809 | Lipid modified azurin<br>protein              | ASMGHNLVIAK                  | A | 0.00008<br>6 |
| Q5F809 | Lipid modified azurin<br>protein              | LIGGGEESLTLDDPAK             | L | 2.2E-06      |
| Q5F809 | Lipid modified azurin<br>protein              | FACTFPGHGALMNGK              | V | 0.00001<br>7 |
| Q5F809 | Lipid modified azurin<br>protein              | FACTFPGHGALMNGKVTLVD         | - | 0.0016       |
| Q5F501 | Lipoprotein                                   | DSAPAASAAAPSADNGAAK          | K | 0.0045       |
| Q5F501 | Lipoprotein                                   | DSAPAASAAAPSADNGAAKK         | E | 0.00005<br>7 |
| Q5F501 | Lipoprotein                                   | EIVFGTTVGDGDMVK              | E | 0.00013      |
| Q5F501 | Lipoprotein                                   | EQIQAELEKK                   | G | 0.018        |
| Q5F501 | Lipoprotein                                   | EHNLDITEAFQVPTAPLGLYPGK      | L | 0.00043      |
| Q5F501 | Lipoprotein                                   | LKSLEEVKDGSTVSAPNDPSNFAR     | A | 5.9E-06      |
| Q5F501 | Lipoprotein                                   | SLEEVKDGSTVSAPNDPSNFAR       | A | 0.00001<br>4 |
| Q5F501 | Lipoprotein                                   | DGSTVSAPNDPSNFAR             | A | 0.0021       |
| Q5F501 | Lipoprotein                                   | ALVMLNELGWIK                 | L | 0.00013      |
| Q5F501 | Lipoprotein                                   | LKDGINPLTASK                 | A | 0.00014      |
| Q5F501 | Lipoprotein                                   | IVELEAAQLPR                  | S | 0.00007<br>5 |
| Q5F501 | Lipoprotein                                   | LTEALFQEPSFAYVNWSAVK         | T | 2.8E-06      |
| Q5F501 | Lipoprotein                                   | TADKDSQWLKDVTEAYNSDAFK       | A | 6.3E-07      |
| Q5F501 | Lipoprotein                                   | RFEGYKYPAAWNEGAAK            | - | 5.7E-06      |
| Q5F501 | Lipoprotein                                   | FEGYKYPAAWNEGAAK             | - | 0.00000<br>1 |
| Q5F5V7 | Major outer membrane<br>protein porin P.IB    | AGVQTYRSVEHTDGK              | V | 0.031        |
| Q5F5V7 | Major outer membrane<br>protein porin P.IB    | AGVQTYRSVEHTDGKVS            | V | 0.007        |
| Q5F5V7 | Major outer membrane<br>protein porin P.IB    | AGVQTYRSVEHTDGKSVK           | I | 2.2E-06      |
| Q5F5V7 | Major outer membrane<br>protein porin P.IB    | SVEHTDGKVS                   | V | 0.00007      |
| Q5F5V7 | Major outer membrane<br>protein porin P.IB    | SVEHTDGKSVKSVETGSEIADFGSK    | I | 3.3E-06      |
| Q5F5V7 | Major outer membrane<br>protein porin P.IB    | VSKVETGSEIADFGSK             | I | 1.6E-07      |
| Q5F5V7 | Major outer membrane<br>protein porin P.IB    | VETGSEIADFGSK                | I | 1.2E-07      |
| Q5F5V7 | Major outer membrane<br>protein porin P.IB    | IGFKGQEDLGNGLK               | A | 7.8E-06      |
| Q5F5V7 | Major outer membrane<br>protein porin P.IB    | GQEDLGNGLK                   | A | 0.00005<br>8 |
| Q5F5V7 | Major outer membrane<br>protein porin P.IB    | AVWQLEQGASVAGTNTGWGNK        | Q | 3E-10        |
| Q5F5V7 | Major outer membrane<br>protein porin P.IB    | AVWQLEQGASVAGTNTGWGNKQSFVGLK | G | 0.03         |
| Q5F5V7 | Major outer membrane<br>protein porin P.IB    | QSFVGLKGGFGTIR               | A | 0.00001<br>1 |
| Q5F5V7 | Major outer membrane<br>protein porin P.IB    | AGSLNSPLK                    | N | 0.00083      |
| Q5F5V7 | Major outer membrane<br>protein porin P.IB    | FTGNVLEISGMAQR               | E | 0.00055      |

|        |                                               |                               |   |          |
|--------|-----------------------------------------------|-------------------------------|---|----------|
| Q5F5V7 | Major outer membrane protein porin P.IB       | YDSPEFAGFSGSVQYAPK            | D | 1.2E-09  |
| Q5F5V7 | Major outer membrane protein porin P.IB       | LVGGYDNNALYVSVAAQQQDAK        | L | 6.2E-11  |
| Q5F5V7 | Major outer membrane protein porin P.IB       | VSYAHGFK                      | G | 0.000027 |
| Q5F5V7 | Major outer membrane protein porin P.IB       | GTVDSANHDNTYDQVVVGAEYDFSKR    | T | 0.00001  |
| Q5F5V7 | Major outer membrane protein porin P.IB       | RTSALVSAGWLQEGK               | G | 3.2E-08  |
| Q5F5V7 | Major outer membrane protein porin P.IB       | TSALVSAGWLQEGK                | G | 2.1E-06  |
| Q5F5V7 | Major outer membrane protein porin P.IB       | TSALVSAGWLQEGKGADK            | I | 8.9E-07  |
| Q5F5V7 | Major outer membrane protein porin P.IB       | TSALVSAGWLQEGKGADKIVSTASAVVLR | H | 0.000006 |
| Q5F5V7 | Major outer membrane protein porin P.IB       | GADKIVSTASAVVLR               | H | 2E-07    |
| Q5F5V7 | Major outer membrane protein porin P.IB       | IVSTASAVVLR                   | H | 3.4E-06  |
| Q5F4X7 | Malonyl CoA-acyl carrier protein transacylase | TVEIKQPQIR                    | V | 0.018    |
| Q5F4X7 | Malonyl CoA-acyl carrier protein transacylase | VIHNADVAAYDDAGK               | I | 0.000055 |
| Q5F4X7 | Malonyl CoA-acyl carrier protein transacylase | IKDALVR                       | Q | 0.023    |
| Q5F726 | Multidrug efflux pump channel protein         | NNLLPTLAANANGSR               | Q | 0.0037   |
| Q5F726 | Multidrug efflux pump channel protein         | AGVISAVALRQQEALIESAK          | A | 1.4E-07  |
| Q5F726 | Multidrug efflux pump channel protein         | NALATLINRPIPEDLPAGLPLDK       | Q | 0.002    |
| Q5F726 | Multidrug efflux pump channel protein         | LPAGLSSEVLLDRPDIR             | A | 0.000051 |
| Q5F726 | Multidrug efflux pump channel protein         | AAEHALKQANANIGAAR             | A | 9.1E-06  |
| Q5F726 | Multidrug efflux pump channel protein         | QANANIGAAR                    | A | 0.0023   |
| Q5F726 | Multidrug efflux pump channel protein         | LTGSGVTGSVELGGLFK             | S | 4.4E-06  |
| Q5F726 | Multidrug efflux pump channel protein         | YKHGVS GALDLLDAER             | I | 1.6E-06  |
| Q5F6N6 | Outer membrane opacity protein D              | NKISTVSDYFR                   | N | 0.0017   |
| Q5F6N6 | Outer membrane opacity protein D              | ISTVSDYFR                     | N | 0.00018  |
| Q5F6N6 | Outer membrane opacity protein D              | VSVG YDFGGWR                  | I | 8.5E-06  |
| Q5F6N6 | Outer membrane opacity protein D              | VAYGHVR                       | H | 0.0018   |
| Q5F5W8 | Outer membrane protein assembly factor BamA   | TEPSTVFNYLPVK                 | V | 0.00035  |
| Q5F5W8 | Outer membrane protein assembly factor BamA   | VGD TYNDTHGSAIK               | S | 0.0051   |
| Q5F5W8 | Outer membrane protein assembly factor BamA   | GKLNIQITPK                    | V | 0.003    |

|        |                                             |                                               |   |              |
|--------|---------------------------------------------|-----------------------------------------------|---|--------------|
| Q5F5W8 | Outer membrane protein assembly factor BamA | ILDTDIQTNEDKTR                                | Q | 0.00024      |
| Q5F5W8 | Outer membrane protein assembly factor BamA | QQMTAVLGEIQNR                                 | M | 0.017        |
| Q5F5W8 | Outer membrane protein assembly factor BamA | IYVNEIHITGNNK                                 | T | 0.00001<br>1 |
| Q5F5W8 | Outer membrane protein assembly factor BamA | TKEIPFFENFYGGGLGSVR                           | G | 0.00001<br>9 |
| Q5F9W0 | Outer membrane protein assembly factor BamD | GLVLFNEDQSFLNK                                | L | 7.4E-06      |
| Q5F9W0 | Outer membrane protein assembly factor BamD | GAYIAAANR                                     | A | 0.0006       |
| Q5F5Y8 | Outer membrane protein assembly factor BamE | AVAALRPGMTKDQVLLLLGSPILR                      | D | 0.0033       |
| Q5F6I1 | Outer membrane protein PIII                 | NAYFDKASQGR                                   | V | 0.00005<br>6 |
| Q5F6I1 | Outer membrane protein PIII                 | ASQGRVECGDAVAVPEPEPAPVAVVEQAPQYVDETISLS<br>AK | T | 0.00018      |
| Q5F6I1 | Outer membrane protein PIII                 | TLFGFDKDSLRL                                  | A | 0.01         |
| Q5F6I1 | Outer membrane protein PIII                 | TLFGFDKDSLRAEAQDNLK                           | V | 0.00005<br>3 |
| Q5F6I1 | Outer membrane protein PIII                 | DSLRAEAQDNLK                                  | V | 0.00027      |
| Q5F6I1 | Outer membrane protein PIII                 | TNVQSVR                                       | V | 0.00031      |
| Q5F6I1 | Outer membrane protein PIII                 | VEGHTDFMGSEK                                  | Y | 0.0013       |
| Q5F6I1 | Outer membrane protein PIII                 | VEGHTDFMGSEKYNQALSER                          | R | 3.9E-07      |
| Q5F6I1 | Outer membrane protein PIII                 | YNQALSER                                      | R | 0.00001<br>8 |
| Q5F6I1 | Outer membrane protein PIII                 | RAYVVANNLVSNGVPASR                            | I | 4.1E-07      |
| Q5F6I1 | Outer membrane protein PIII                 | AYVVANNLVSNGVPASR                             | I | 2.5E-09      |
| Q5F6I1 | Outer membrane protein PIII                 | ISAVGLGESQAQMTQVCQAEVAK                       | L | 5.7E-09      |
| Q5F6I1 | Outer membrane protein PIII                 | EALIACIEPDR                                   | R | 0.0011       |
| Q5F6I1 | Outer membrane protein PIII                 | EALIACIEPDRRVDVK                              | I | 0.044        |
| Q5F6I1 | Outer membrane protein PIII                 | IRSIVTR                                       | Q | 0.02         |
| Q5F7F3 | Peptidyl-prolyl cis-trans isomerase         | SLKQMKEQGAEIDLK                               | V | 0.003        |
| Q5F7F3 | Peptidyl-prolyl cis-trans isomerase         | FLQEQQAK                                      | A | 0.027        |
| Q5F7F3 | Peptidyl-prolyl cis-trans isomerase         | ANKEKGEAFLKENAAK                              | D | 0.00003<br>9 |
| Q5F7F3 | Peptidyl-prolyl cis-trans isomerase         | ANKEKGEAFLKENAAKDGVK                          | T | 0.046        |
| Q5F7F3 | Peptidyl-prolyl cis-trans isomerase         | DGVKTTASGLQYK                                 | I | 0.03         |
| Q5F7F3 | Peptidyl-prolyl cis-trans isomerase         | DGVKTTASGLQYKITK                              | Q | 0.00013      |

|        |                                             |                                 |   |          |
|--------|---------------------------------------------|---------------------------------|---|----------|
| Q5F7F3 | Peptidyl-prolyl cis-trans isomerase         | TTASGLQYK                       | I | 0.0036   |
| Q5F7F3 | Peptidyl-prolyl cis-trans isomerase         | TTASGLQYKITK                    | Q | 0.000073 |
| Q5F7F3 | Peptidyl-prolyl cis-trans isomerase         | QGEGKQPTKDDIVTVEYEGR            | L | 0.0017   |
| Q5F7F3 | Peptidyl-prolyl cis-trans isomerase         | LIDGTVFDSSK                     | A | 0.0018   |
| Q5F7F3 | Peptidyl-prolyl cis-trans isomerase         | ANGGPATFPLSQVIPGWTEGVR          | L | 1E-07    |
| Q5F7F3 | Peptidyl-prolyl cis-trans isomerase         | LLKEGGEATFYIPSNLAYREQGAGEK      | I | 0.00024  |
| Q5F7F3 | Peptidyl-prolyl cis-trans isomerase         | EGGEATFYIPSNLAYR                | E | 0.000011 |
| Q5F7F3 | Peptidyl-prolyl cis-trans isomerase         | IGPNATLVFDVK                    | L | 2.6E-06  |
| Q5F7F3 | Peptidyl-prolyl cis-trans isomerase         | IGAPENAPAKQPDQVDIK              | K | 0.0023   |
| Q5F7F3 | Peptidyl-prolyl cis-trans isomerase         | IGAPENAPAKQPDQVDIKK             | V | 0.0044   |
| Q5F7F3 | Peptidyl-prolyl cis-trans isomerase         | IGAPENAPAKQPDQVDIKKVN           | - | 0.0013   |
| Q5F820 | Peptidyl-prolyl cis-trans isomerase         | FKATVESVR                       | D | 0.0068   |
| Q5F9L7 | Peptidyl-prolyl cis-trans isomerase         | TVVQDWGYAVFGK                   | V | 0.000085 |
| Q5F9L7 | Peptidyl-prolyl cis-trans isomerase         | VVDGFDVVDAIESV <sub>s</sub> TKR | H | 1.7E-08  |
| Q5F668 | Phospho-2-dehydro-3-deoxyheptonate aldolase | ELLPPIAHLYELPISK                | E | 0.013    |
| Q5F668 | Phospho-2-dehydro-3-deoxyheptonate aldolase | EASGLVHR                        | T | 0.013    |
| Q5FA34 | Phosphoenolpyruvate synthase                | ADNYVIWFENLR                    | M | 0.000016 |
| Q5FA34 | Phosphoenolpyruvate synthase                | NASLGEMISQLTEK                  | G | 0.000026 |
| Q5FA34 | Phosphoenolpyruvate synthase                | VPGGFATTADAYR                   | A | 9.6E-07  |
| Q5FA34 | Phosphoenolpyruvate synthase                | AFLAHNGLNER                     | I | 0.0033   |
| Q5FA34 | Phosphoenolpyruvate synthase                | VHKGFEHDIVALSAGVQR              | M | 2.1E-08  |
| Q5FA34 | Phosphoenolpyruvate synthase                | GFEHDIVALSAGVQR                 | M | 0.000035 |
| Q5FA34 | Phosphoenolpyruvate synthase                | MIFTDKAEAGK                     | S | 0.0078   |
| Q5FA34 | Phosphoenolpyruvate synthase                | DGLDGKLYILQARPETVK              | S | 0.00013  |
| Q5FA34 | Phosphoenolpyruvate synthase                | LYILQARPETVK                    | S | 0.000032 |
| Q5FA34 | Phosphoenolpyruvate synthase                | VRDEMGLTNVEIMIPFVR              | T | 0.00066  |
| Q5FA34 | Phosphoenolpyruvate synthase                | ALKENGLER                       | G | 0.0052   |
| Q5FAD1 | Pilin assembly protein                      | KAELLNSSDKNTEQAAAPAAEQN         | - | 0.013    |
| Q5F693 | Pilus assembly protein                      | KITQEDITVFTR                    | Q | 0.000012 |
| Q5F693 | Pilus assembly protein                      | AGLPLMQAFEIVAR                  | G | 5.4E-08  |
| Q5F693 | Pilus assembly protein                      | GQVEQGSSLSR                     | A | 0.00045  |
| Q5FAD0 | Pilus assembly protein                      | SIDAASLNLRDELASIR               | S | 0.013    |
| Q5FAD0 | Pilus assembly protein                      | IAQSPENGGNPDGK                  | S | 0.035    |
| Q5FAD0 | Pilus assembly protein                      | SSILNLSAIATTYQAK                | S | 8.6E-08  |

|        |                                                     |                     |   |              |
|--------|-----------------------------------------------------|---------------------|---|--------------|
| Q5FAG7 | Pilus-associated protein                            | VQMYSASVSTYPGSSSSR  | I | 3.1E-07      |
| Q5FAG7 | Pilus-associated protein                            | KDIEGNDSLAK         | E | 0.0078       |
| Q5FAG7 | Pilus-associated protein                            | TQNGKYAAFLASGYAAK   | N | 0.00003<br>3 |
| Q5FAG7 | Pilus-associated protein                            | YAAFLASGYAAK        | N | 0.00002<br>3 |
| Q5FAG7 | Pilus-associated protein                            | TIFEGDKPITSAPAVSR   | L | 0.00017      |
| Q5FAG7 | Pilus-associated protein                            | TVCPNGYVYDKPVNVR    | Y | 0.00071      |
| Q5F7F1 | Probable cytosol aminopeptidase                     | FSQAVFHSAHEAAVK     | E | 0.0023       |
| Q5F7F1 | Probable cytosol aminopeptidase                     | VAEAQVYGQSLCR       | D | 0.036        |
| Q5F7F1 | Probable cytosol aminopeptidase                     | TAKAEAEKLGAAK       | I | 1.2E-06      |
| Q5F7F1 | Probable cytosol aminopeptidase                     | GATGRPVPLLMNYLR     | N | 0.00039      |
| Q5FA43 | Protein translocase subunit SecD                    | QNITTLHNR           | V | 0.0002       |
| Q5F8V3 | Pseudouridine synthase                              | QWRDGAAPSACK        | T | 0.048        |
| Q5F8V3 | Pseudouridine synthase                              | GQFYELNPAEVANILK    | W | 9.5E-07      |
| Q5F874 | Putative 2-oxoglutarate dehydrogenase, E1 component | IASAVAGGADEAMLKK    | Q | 4.8E-07      |
| Q5F874 | Putative 2-oxoglutarate dehydrogenase, E1 component | IQGVGAAQLDPLK       | R | 2.6E-06      |
| Q5F874 | Putative 2-oxoglutarate dehydrogenase, E1 component | IQGVGAAQLDPLKR      | I | 0.00002<br>5 |
| Q5F874 | Putative 2-oxoglutarate dehydrogenase, E1 component | NYFESVLSTPHYNADQK   | R | 2.1E-06      |
| Q5F874 | Putative 2-oxoglutarate dehydrogenase, E1 component | ILKEMTAAETLER       | Y | 0.0036       |
| Q5F874 | Putative 2-oxoglutarate dehydrogenase, E1 component | STVHCTDIAK          | M | 0.015        |
| Q5F874 | Putative 2-oxoglutarate dehydrogenase, E1 component | EKIETGLPAADIER      | L | 0.00033      |
| Q5F874 | Putative 2-oxoglutarate dehydrogenase, E1 component | LTEKFTAVPEGFALHPTAK | R | 0.00019      |
| Q5F874 | Putative 2-oxoglutarate dehydrogenase, E1 component | FTAVPEGFALHPTAK     | R | 1.3E-07      |
| Q5F874 | Putative 2-oxoglutarate dehydrogenase, E1 component | QAIDWGMATLAYASLLTK  | G | 1.1E-09      |
| Q5F874 | Putative 2-oxoglutarate dehydrogenase, E1 component | VVLCAGQVYDLEAGR     | A | 1.1E-06      |
| Q5F874 | Putative 2-oxoglutarate dehydrogenase, E1 component | VEQLYFPYDEVKAELAK   | Y | 0.011        |
| Q5F874 | Putative 2-oxoglutarate dehydrogenase, E1 component | NQGAFYQIR           | H | 0.0022       |
| Q5F874 | Putative 2-oxoglutarate dehydrogenase, E1 component | HRIEDVISEEQK        | L | 0.038        |

|        |                                                                   |                                      |   |          |
|--------|-------------------------------------------------------------------|--------------------------------------|---|----------|
| Q5F4Y0 | Putative 3-oxoacyl-[acyl-carrier protein] reductase               | IALVTGASR                            | G | 0.01     |
| Q5F4Y0 | Putative 3-oxoacyl-[acyl-carrier protein] reductase               | GIGAAIADTLAAAGAK                     | I | 7E-08    |
| Q5F4Y0 | Putative 3-oxoacyl-[acyl-carrier protein] reductase               | IIGTATGESGAAAISK                     | R | 1.2E-06  |
| Q5F4Y0 | Putative 3-oxoacyl-[acyl-carrier protein] reductase               | IIGTATGESGAAAISKR                    | L | 0.033    |
| Q5F4Y0 | Putative 3-oxoacyl-[acyl-carrier protein] reductase               | LAQWGGEGR                            | V | 0.00026  |
| Q5F4Y0 | Putative 3-oxoacyl-[acyl-carrier protein] reductase               | VLNSAEPETVENLIADIEK                  | T | 5.5E-07  |
| Q5F4Y0 | Putative 3-oxoacyl-[acyl-carrier protein] reductase               | TFGKLDILVNNAGITR                     | D | 0.00021  |
| Q5F4Y0 | Putative 3-oxoacyl-[acyl-carrier protein] reductase               | LDILVNNAGITR                         | D | 0.033    |
| Q5F4Y0 | Putative 3-oxoacyl-[acyl-carrier protein] reductase               | ALPEETRQFTTAQTALGR                   | F | 0.019    |
| Q5F4Y0 | Putative 3-oxoacyl-[acyl-carrier protein] reductase               | FGDAQDIADAVLFLASDQAK                 | Y | 4.7E-12  |
| Q5F4Y0 | Putative 3-oxoacyl-[acyl-carrier protein] reductase               | YITGQTLHVNGGMLMP                     | - | 0.00071  |
| Q5F6I5 | Putative ABC transporter, ATP-binding protein                     | LGNEVIEFVNVSK                        | S | 3.5E-07  |
| Q5F6I5 | Putative ABC transporter, ATP-binding protein                     | VPAGAIVGIIIGPNGAGK                   | S | 9.7E-07  |
| Q5F6I5 | Putative ABC transporter, ATP-binding protein                     | DILQVGQFEIPAR                        | Q | 0.000018 |
| Q5F9W7 | Putative ABC transporter, ATP-binding protein, amino acid         | KGEVVVVCGPSGSGK                      | S | 0.037    |
| Q5F9W7 | Putative ABC transporter, ATP-binding protein, amino acid         | DAFPSQLSGGQQQR                       | V | 0.00063  |
| Q5F9W7 | Putative ABC transporter, ATP-binding protein, amino acid         | AKQFLQQVMTH                          | - | 0.017    |
| Q5F9M1 | Putative ABC transporter, periplasmic binding protein, amino acid | INNKGTVTVGTEGTYAPFTYHDKDGK           | L | 0.000029 |
| Q5F9M1 | Putative ABC transporter, periplasmic binding protein, amino acid | INNKGTVTVGTEGTYAPFTYHDKDGKLTGYDVEVTR | A | 0.000055 |
| Q5F9M1 | Putative ABC transporter,                                         | VEFKETQWDSMMAGLK                     | A | 0.000062 |

|        |                                                                   |                             |   |          |
|--------|-------------------------------------------------------------------|-----------------------------|---|----------|
|        | periplasmic binding protein, amino acid                           |                             |   |          |
| Q5F9M1 | Putative ABC transporter, periplasmic binding protein, amino acid | AGRFDVVANQVGLTSPER          | Q | 2.4E-08  |
| Q5F9M1 | Putative ABC transporter, periplasmic binding protein, amino acid | FDVVANQVGLTSPER             | Q | 2.5E-06  |
| Q5F9M1 | Putative ABC transporter, periplasmic binding protein, amino acid | QATFDKSEPYSWGAVLVAHNDSNIK   | S | 0.000015 |
| Q5F9M1 | Putative ABC transporter, periplasmic binding protein, amino acid | SEPYSWGAVLVAHNDSNIK         | S | 0.000011 |
| Q5F9M1 | Putative ABC transporter, periplasmic binding protein, amino acid | TAQSLTSNYGEK                | A | 0.000031 |
| Q5F9M1 | Putative ABC transporter, periplasmic binding protein, amino acid | AKAAGAQLVPVDGLAQSLTLIEQK    | R | 0.00016  |
| Q5F9M1 | Putative ABC transporter, periplasmic binding protein, amino acid | AAGAQLVPVDGLAQSLTLIEQK      | R | 1.1E-08  |
| Q5F9M1 | Putative ABC transporter, periplasmic binding protein, amino acid | AAGAQLVPVDGLAQSLTLIEQKR     | A | 5.8E-09  |
| Q5F9M1 | Putative ABC transporter, periplasmic binding protein, amino acid | RADATLNDELAVLDYLK           | K | 3.6E-08  |
| Q5F9M1 | Putative ABC transporter, periplasmic binding protein, amino acid | RADATLNDELAVLDYLKK          | N | 5.7E-08  |
| Q5F9M1 | Putative ABC transporter, periplasmic binding protein, amino acid | ADATLNDELAVLDYLK            | K | 4.1E-08  |
| Q5F9M1 | Putative ABC transporter, periplasmic binding protein, amino acid | ADATLNDELAVLDYLKK           | N | 0.00013  |
| Q5F9M1 | Putative ABC transporter, periplasmic binding protein, amino acid | IVWSAPADEKVGSGLIVNK         | G | 5.2E-08  |
| Q5F9M1 | Putative ABC transporter, periplasmic binding protein, amino acid | IVWSAPADEKVGSGLIVNKGNDEAVAK | F | 0.00019  |
| Q5F9M1 | Putative ABC transporter, periplasmic binding protein, amino acid | VGSGLIVNK                   | G | 0.033    |
| Q5F9M1 | Putative ABC transporter,                                         | VGSGLIVNKGNDEAVAK           | F | 0.00004  |



|        |                                                                   |                     |   |          |
|--------|-------------------------------------------------------------------|---------------------|---|----------|
|        | periplasmic binding protein, amino acid                           |                     |   |          |
| Q5F9M1 | Putative ABC transporter, periplasmic binding protein, amino acid | FSTAINELK           | A | 0.000099 |
| Q5F9M1 | Putative ABC transporter, periplasmic binding protein, amino acid | FSTAINELKADGTLK     | K | 4.2E-06  |
| Q5F9M1 | Putative ABC transporter, periplasmic binding protein, amino acid | FSTAINELKADGTLKK    | L | 0.000031 |
| Q5F9M1 | Putative ABC transporter, periplasmic binding protein, amino acid | KLGEQFFGKDISVQ      | - | 3.4E-07  |
| Q5F9M1 | Putative ABC transporter, periplasmic binding protein, amino acid | LGEQFFGKDISVQ       | - | 0.00028  |
| Q5F6Q5 | Putative ABC transporter, periplasmic binding protein, polyamine  | SGYDLVVPGIAFLPR     | Q | 2.6E-06  |
| Q5F6Q5 | Putative ABC transporter, periplasmic binding protein, polyamine  | VNKDLIPNYKNIDPELLK  | M | 0.015    |
| Q5F6Q5 | Putative ABC transporter, periplasmic binding protein, polyamine  | GSNPEDLKAAA EVLK    | S | 0.00011  |
| Q5F6Q5 | Putative ABC transporter, periplasmic binding protein, polyamine  | RFSPSIIDELAR        | G | 0.017    |
| Q5F6Q5 | Putative ABC transporter, periplasmic binding protein, polyamine  | FSPSIIDELAR         | G | 0.00083  |
| Q5F6Q5 | Putative ABC transporter, periplasmic binding protein, polyamine  | ARSEEVKNNV GIEVLTPK | G | 4.8E-06  |
| Q5F6Q5 | Putative ABC transporter, periplasmic binding protein, polyamine  | SEEVKNNV GIEVLTPK   | G | 0.000048 |
| Q5F6Q5 | Putative ABC transporter, periplasmic binding protein, polyamine  | YINYTLDP EIAAK      | N | 0.00074  |
| Q5F6Q5 | Putative ABC transporter, periplasmic binding protein, polyamine  | NGIAVTFAPASKPAR     | E | 0.000044 |
| Q5F6Q5 | Putative ABC transporter, periplasmic binding protein, polyamine  | EKMPAELVNTR         | S | 0.00041  |
| Q5F6Q5 | Putative ABC transporter,                                         | MPAELVNTR           | S | 0.028    |

|        |                                                                  |                           |   |          |
|--------|------------------------------------------------------------------|---------------------------|---|----------|
|        | periplasmic binding protein, polyamine                           |                           |   |          |
| Q5F7C5 | Putative ABC transporter, periplasmic binding protein, polyamine | NGNFVTYAPSSKPAR           | D | 0.0064   |
| Q5FA28 | Putative ABC transporter, periplasmic binding protein, polyamine | SGYDLTAPSIANVGR           | Q | 3.1E-06  |
| Q5FA28 | Putative ABC transporter, periplasmic binding protein, polyamine | AQIPHYGNIDKDLLK           | M | 0.00022  |
| Q5FA28 | Putative ABC transporter, periplasmic binding protein, polyamine | TGVGWVDSFMIPR             | D | 0.00078  |
| Q5FA28 | Putative ABC transporter, periplasmic binding protein, polyamine | YIDYTLRPEVAAK             | N | 0.0039   |
| Q5F8K8 | Putative ABC-transporter, ATP-binding protein                    | FAEYDGYTAEAR              | A | 1.6E-07  |
| Q5F8K8 | Putative ABC-transporter, ATP-binding protein                    | LQELQEFVAR                | F | 0.025    |
| Q5F8K8 | Putative ABC-transporter, ATP-binding protein                    | LKQADKIKSEMVEVKPSTR       | Q | 0.008    |
| Q5F8K8 | Putative ABC-transporter, ATP-binding protein                    | SEMVEVKPSTR               | Q | 0.014    |
| Q5F8K8 | Putative ABC-transporter, ATP-binding protein                    | LAIIGPNGACK               | S | 0.00068  |
| Q5F8B6 | Putative ABC-type transporter, ATP-binding protein               | SREDKIQTASAPK             | A | 0.013    |
| Q5F655 | Putative adenylosuccinate lyase                                  | LLELTPALYVGK              | A | 0.0037   |
| Q5F655 | Putative adenylosuccinate lyase                                  | LLELTPALYVGKAEALAK        | R | 0.000037 |
| Q5F6V3 | Putative alcohol dehydrogenase                                   | MKMQAVVVNK                | N | 0.00014  |
| Q5F6V3 | Putative alcohol dehydrogenase                                   | ETGADLVVNAAKEDAAK         | V | 0.00043  |
| Q5F6V3 | Putative alcohol dehydrogenase                                   | TGGAHAHVVTAVSAAAFNSAVNCVR | A | 0.015    |
| Q5F6V3 | Putative alcohol dehydrogenase                                   | VVAVGLPPESMDLSIPR         | L | 0.033    |
| Q5F6V3 | Putative alcohol dehydrogenase                                   | LVLGDGIEVVGSLVGTR         | K | 2.1E-07  |
| Q5F6V3 | Putative alcohol dehydrogenase                                   | LVLGDGIEVVGSLVGTRK        | D | 5.8E-07  |
| Q5F6V3 | Putative alcohol dehydrogenase                                   | ALDEAPAIFQEMR             | E | 0.000049 |
| Q5F8U5 | Putative aldehyde dehydrogenase                                  | ILAAHAGANLKK              | T | 0.00042  |
| Q5F758 | Putative amino acid aminotransferase                             | IVTVQTLGGSGALK            | V | 0.0036   |
| Q5F6U0 | Putative aminopeptidase                                          | LIEGINPSTFFK              | S | 0.00038  |

|        |                                                    |                             |   |          |
|--------|----------------------------------------------------|-----------------------------|---|----------|
| Q5F6U0 | Putative aminopeptidase                            | VVPVGTPTAEQKR               | D | 0.0049   |
| Q5F6U0 | Putative aminopeptidase                            | RLEPLTEGAAK                 | A | 0.004    |
| Q5FA72 | Putative aminopeptidase N                          | YLKDYQTPAYR                 | I | 0.013    |
| Q5FA72 | Putative aminopeptidase N                          | LKNNVFELTIK                 | Q | 0.02     |
| Q5FA72 | Putative aminopeptidase N                          | RSDTLQVQVQTALQHPK           | F | 1.7E-06  |
| Q5FA72 | Putative aminopeptidase N                          | NVPHFHAQDGSQYR              | F | 0.0089   |
| Q5F9D9 | Putative aminotransferases                         | TYHGSAMSIPVQR               | A | 0.0084   |
| Q5F9D9 | Putative aminotransferases                         | AAIQVLPGR                   | F | 0.0011   |
| Q5F6R0 | Putative aspartyl-tRNA synthetase                  | LRYQVATGVR                  | R | 0.0083   |
| Q5F6R0 | Putative aspartyl-tRNA synthetase                  | VHPGFEFFALPQSPQLFK          | Q | 0.00027  |
| Q5F6R0 | Putative aspartyl-tRNA synthetase                  | QVFKDALNVDLGDFPR            | M | 0.000001 |
| Q5F6R0 | Putative aspartyl-tRNA synthetase                  | VVALRVPNGAK                 | F | 0.0008   |
| Q5F6R0 | Putative aspartyl-tRNA synthetase                  | VNDAGNLSNGEDSGLQSPIVK       | F | 0.00049  |
| Q5F6R0 | Putative aspartyl-tRNA synthetase                  | YVAVHHPFTAPK                | E | 0.026    |
| Q5F6R0 | Putative aspartyl-tRNA synthetase                  | EGHEDLMVSDPANCLAR           | A | 0.002    |
| Q5F6R0 | Putative aspartyl-tRNA synthetase                  | FGLLDNLK                    | F | 0.00046  |
| Q5F6R0 | Putative aspartyl-tRNA synthetase                  | FGAPPHGGLAFGLDR             | L | 0.00014  |
| Q5F6R0 | Putative aspartyl-tRNA synthetase                  | LVTLMTGAESIRDVIAFPK         | T | 0.039    |
| Q5F6R0 | Putative aspartyl-tRNA synthetase                  | AQCLLDAPNSVDDK              | Q | 8.8E-07  |
| Q5F6R0 | Putative aspartyl-tRNA synthetase                  | AQCLLDAPNSVDDKQLR           | E | 0.017    |
| Q5FAG6 | Putative atpase                                    | TLLDTVAVPNTAR               | T | 0.0022   |
| Q5FAG6 | Putative atpase                                    | LNVPLLGQLPLSLPVR            | E | 0.000068 |
| Q5F9I6 | Putative ATP-dependent C1p protease                | QKKVIGK                     | A | 0.00085  |
| Q5F8W0 | Putative ATP-dependent RNA helicase                | GIDVPTITHVINYLDPK           | Q | 0.0029   |
| Q5F8W0 | Putative ATP-dependent RNA helicase                | RGDHKPGKEGFGGK              | T | 0.00087  |
| Q5FA80 | Putative ATP-dependent RNA helicase                | ALAGHDLLAAAQTGTGK           | T | 3.9E-07  |
| Q5FA80 | Putative ATP-dependent RNA helicase                | YATASTSPAMHPVR              | M | 0.0004   |
| Q5F697 | Putative branched-chain amino acid aminotranferase | IVLFRPTANIAR                | M | 0.00094  |
| Q5F697 | Putative branched-chain amino acid aminotranferase | AADEIPDAPAALYLRPTLIGTDPVIGK | A | 0.0029   |

|        |                                                       |                                |   |          |
|--------|-------------------------------------------------------|--------------------------------|---|----------|
| Q5F697 | Putative branched-chain amino acid aminotranferase    | AGSPSETALLYILASPVGDYFK         | V | 0.000026 |
| Q5FAB9 | Putative carboxypeptidase, penicillin binding protein | RSDNLIAR                       | S | 0.025    |
| Q5F932 | Putative carboxy-terminal processing protease         | AVIVGTQSF GK                   | G | 0.0029   |
| Q5F8D2 | Putative cell-division protein                        | SPDVSQGSVSDGTAVR               | D | 0.00013  |
| Q5F8D2 | Putative cell-division protein                        | APHLLVAGTTGSGK                 | S | 0.000059 |
| Q5F4Z9 | Putative chromosome segregation protein               | AAQIAGLSEIPAVIK                | T | 0.0031   |
| Q5F4Z9 | Putative chromosome segregation protein               | TISDE TALAMGLIENLQR            | E | 3.7E-06  |
| Q5F4Z9 | Putative chromosome segregation protein               | LADEFGLTHETIAQAVGK             | S | 8.8E-09  |
| Q5F4Z9 | Putative chromosome segregation protein               | LLSLPESVQEMLYQR                | R | 0.000003 |
| Q5F4Z9 | Putative chromosome segregation protein               | ALLTLPVVEQLELAQK               | A | 0.0019   |
| Q5F4Z9 | Putative chromosome segregation protein               | SQAALQNKRPPEK                  | K | 0.0007   |
| Q5F7W9 | Putative ClpB protein                                 | QRLQQHLNSLPK                   | V | 0.032    |
| Q5F7W9 | Putative ClpB protein                                 | VSGQGGEILPSR                   | E | 0.0015   |
| Q5F7W9 | Putative ClpB protein                                 | EAGATEQNINAAIDAVR              | G | 0.00011  |
| Q5F7W9 | Putative ClpB protein                                 | TKNNPVLIGEPGVGK                | T | 0.00057  |
| Q5F7W9 | Putative ClpB protein                                 | LLVLDLAALIAGAK                 | Y | 3E-09    |
| Q5F7W9 | Putative ClpB protein                                 | VLVGEPVVEDTIAILR               | G | 2.1E-07  |
| Q5F7W9 | Putative ClpB protein                                 | FLPDKAIDLIDEAASR               | V | 0.0002   |
| Q5F7W9 | Putative ClpB protein                                 | AISDGAANIKK                    | Q | 0.0029   |
| Q5F7W9 | Putative ClpB protein                                 | IKIEQAKR                       | Q | 0.05     |
| Q5F7W9 | Putative ClpB protein                                 | NNVGAEIEAEVVSR                 | M | 3.2E-06  |
| Q5F7W9 | Putative ClpB protein                                 | SGLADPNKPYGSFLFLGPTGVGK        | T | 0.004    |
| Q5F7W9 | Putative ClpB protein                                 | ALAGFLFDS EDHLIR               | I | 0.000012 |
| Q5F7W9 | Putative ClpB protein                                 | AIQSEIENPLAK                   | A | 0.0011   |
| Q5F9I4 | Putative cold shock protein                           | GFGFITPDEGGEDLFAHFSAINMEGFK    | T | 0.000079 |
| Q5F9I4 | Putative cold shock protein                           | GFGFITPDEGGEDLFAHFSAINMEGFKTLK | E | 0.0032   |
| Q5F9I4 | Putative cold shock protein                           | VSFDVTTGPK                     | G | 0.0019   |
| Q5F9I4 | Putative cold shock protein                           | GKQAANIQAA                     | - | 0.018    |
| Q5F759 | Putative cytochrome                                   | IQPVGQLTMGDGIPVGER             | Q | 1.9E-07  |
| Q5F759 | Putative cytochrome                                   | GGAADLTDQELKR                  | A | 0.0011   |
| Q5F759 | Putative cytochrome                                   | AEDKGAAAPAVGVDGK               | K | 0.00017  |
| Q5F759 | Putative cytochrome                                   | AEDKGAAAPAVGVDGKK              | V | 0.0013   |
| Q5F759 | Putative cytochrome                                   | HALEGFNAMPK                    | G | 0.0092   |
| Q5FAC5 | Putative cytochrome                                   | SGEANPKENPELGAK                | I | 0.0001   |
| Q5FAC5 | Putative cytochrome                                   | MSEEDLKAVANFIQGLR              | - | 2.5E-07  |
| Q5F716 | Putative cytochrome c oxidase subunit                 | AATQPAPGVKPYNALQVAGR           | D | 0.000023 |
